# Supplementary material
Source: publisher figshare collection journal article supplement (https://asha.figshare.com/ndownloader/files/38414795)
Supplement: Supplementary file 1 [file 38414795]

**Supplemental Material S1.** List of foods/liquids the children consumed each day.

**UCP group**

| ID    | Day | Solid and Semisolid                                      | Utensils used        | Liquid             |
|-------|-----|----------------------------------------------------------|----------------------|--------------------|
| UCP 1 | 1   | Chips, pudding                                           | Finger-feeding/spoon | Juice pouch        |
| UCP 1 | 2   | PBJ (peanut butter jelly) sandwich, chips                | Finger-feeding       | Juice pouch        |
| UCP 1 | 3   | Sandwich, meat, bread, chips                             | Finger-feeding       | Juice pouch        |
| UCP 1 | 4   | Chips, chicken                                           | Finger-feeding/fork  | Juice pouch        |
| UCP 1 | 5   | Skittles, sandwich, meat                                 | Finger-feeding       | Juice pouch        |
| UCP 1 | 6   | Sandwich, fruit                                          | Finger-feeding/fork  | Juice pouch        |
| UCP 1 | 7   | Orange                                                   | Finger-feeding       | Juice pouch        |
| UCP 1 | 8   | Salami, sandwich, chips                                  | Finger-feeding       | Juice pouch        |
| UCP 1 | 9   | PB (peanut butter), PBJ sandwich, apple, apple w/ PB     | Finger-feeding       | Juice pouch        |
| UCP 1 | 10  | PB, PBJ sandwich, chips, gushers                         | Finger-feeding       | Juice              |
| UCP 1 | 11  | PBJ sandwich, chips, brownie                             | Finger-feeding       | Juice              |
| UCP 1 | 12  | Chips, chicken                                           | Finger-feeding       | Water              |
| UCP 1 | 13  | PBJ sandwich, chips                                      | Finger-feeding       | Juice              |
| UCP 1 | 14  | PBJ sandwich                                             | Finger-feeding       | No liquid          |
| UCP 1 | 15  | Pizza                                                    | Finger-feeding       | Juice              |
|       |     |                                                          |                      |                    |
| UCP 2 | 1   | Salami sandwich, fruit                                   | Finger-feeding       | Juice              |
| UCP 2 | 2   | Salami sandwich, fruit, salami, crackers, cracker sticks | Finger-feeding       | Juice, water       |
| UCP 2 | 3   | PBJ sandwich, cracker sticks                             | Finger-feeding       | Juice pouch, water |
| UCP 2 | 4   | Salami sandwich, fruit, cake                             | Finger-feeding       | Juice pouch, water |
| UCP 2 | 5   | Salami sandwich, fruit, salami, cracker sticks           | Finger-feeding       | Water              |
| UCP 2 | 6   | Salami sandwich, fruit, cracker sticks                   | Finger-feeding       | Water              |
| UCP 2 | 7   | Salami sandwich, watermelon, fruit cup                   | Finger-feeding/fork  | Juice pouch        |
| UCP 2 | 8   | PBJ sandwich, watermelon                                 | Finger-feeding/fork  | Water              |
| UCP 2 | 9   | Bagel and cream cheese, fruit, pretzels                  | Finger-feeding       | Water              |

|       |    |                                                                        |                      |               |
|-------|----|------------------------------------------------------------------------|----------------------|---------------|
| UCP 2 | 10 | Salami sandwich, chips, yogurt                                         | Finger-feeding/spoon | Water         |
| UCP 2 | 11 | Salami sandwich, cracker sticks                                        | Finger-feeding       | Juice pouch   |
| UCP 2 | 12 | PBJ sandwich, Veggie Straws                                            | Finger-feeding       | Water         |
| UCP 2 | 13 | Noodles, cracker sticks                                                | Finger-feeding/fork  | Water         |
| UCP 2 | 14 | Macaroni, cracker sticks                                               | Finger-feeding/fork  | Water         |
| UCP 2 | 15 | Pizza                                                                  | Finger-feeding       | Diet coke     |
|       |    |                                                                        |                      |               |
| UCP 3 | 1  | Pizza, cucumbers, chips                                                | Finger-feeding       | Unknown drink |
| UCP 3 | 2  | Pizza, chips, cucumbers                                                | Finger-feeding       | Unknown drink |
| UCP 3 | 3  | Sandwich, chicken, chips, bread, cucumbers, Goldfish cracker           | Finger-feeding       | Unknown drink |
| UCP 3 | 4  | Chicken, Goldfish cracker, cucumbers                                   | Finger-feeding/fork  | Unknown drink |
| UCP 3 | 5  | Chicken sandwich, Goldfish crackers, cucumbers                         | Finger-feeding       | Unknown drink |
| UCP 3 | 6  | Pizza, chips, cucumbers                                                | Finger-feeding       | Unknown drink |
| UCP 3 | 7  | Pickles, pizza, Goldfish                                               | Finger-feeding       | Unknown drink |
| UCP 3 | 8  | Pizza, cucumber, chips                                                 | Finger-feeding       | Unknown drink |
| UCP 3 | 9  | Pizza, cucumber, Goldfish                                              | Finger-feeding       | Water         |
| UCP 3 | 10 | Crackers, Goldfish, chicken finger, cucumber                           | Finger-feeding       | Water         |
| UCP 3 | 11 | Chicken tenders, chips, cucumbers                                      | Finger-feeding       | Water         |
| UCP 3 | 12 | Oreos, cheese crackers, chicken finger, cucumbers                      | Finger-feeding       | Water         |
| UCP 3 | 13 | Pancake, pancake and chicken fingers, cheese cracker, cucumbers, Oreos | Finger-feeding/fork  | Water         |
| UCP 3 | 14 | Chicken finger, cheese cracker, cucumbers, Oreos                       | Finger-feeding       | Unknown drink |
| UCP 3 | 15 | Pizza, Oreos                                                           | Finger-feeding       | Unknown drink |
|       |    |                                                                        |                      |               |
| UCP 4 | 1  | Cookie, carrots, sandwich, applesauce                                  | Finger-feeding/spoon | Water         |
| UCP 4 | 2  | Carrots, sandwich, applesauce                                          | Finger-feeding/spoon | Water, juice  |
| UCP 4 | 3  | Strawberries, carrots, graham crackers, sandwich                       | Finger-feeding       | Water, juice  |
| UCP 4 | 4  | Sandwich, carrots                                                      | Finger-feeding       | Water         |
| UCP 4 | 5  | Sandwich, carrots, applesauce                                          | Finger-feeding/spoon | Water         |
| UCP 4 | 6  | Fig Newtons, sandwich, carrots                                         | Finger-feeding       | Water         |

|       |    |                                                |                      |                    |
|-------|----|------------------------------------------------|----------------------|--------------------|
| UCP 4 | 7  | Sandwich, carrots                              | Finger-feeding       | Water              |
| UCP 4 | 8  | Banana, sandwich, Fig Newtons                  | Finger-feeding       | Juice pouch        |
| UCP 4 | 9  | Sandwich, Fig Newtons, carrots, dried fruit    | Finger-feeding       | Water              |
| UCP 4 | 10 | Sandwich, Oreos, applesauce                    | Finger-feeding/spoon | Water              |
| UCP 4 | 11 | Pancake, PBJ sandwich                          | Finger-feeding/fork  | Water              |
| UCP 4 | 12 | PBJ sandwich, pancake                          | Finger-feeding/fork  | Water              |
| UCP 4 | 13 | PBJ sandwich, pancake, carrots                 | Finger-feeding/fork  | Water              |
| UCP 4 | 14 | Cheez-Its, pancake, PBJ, Oreos                 | Finger-feeding/fork  | Apple juice, water |
| UCP 4 | 15 | Pizza, carrots                                 | Finger-feeding       | Water              |
|       |    |                                                |                      |                    |
| UCP 5 | 1  | PBJ sandwich                                   | Finger-feeding       | Water              |
| UCP 5 | 2  | PBJ sandwich, pretzels                         | Finger-feeding       | Water              |
| UCP 5 | 3  | Chicken, sandwich, pretzels                    | Finger-feeding       | Water              |
| UCP 5 | 4  | Vegetable, chicken, dessert                    | Finger-feeding       | Water              |
| UCP 5 | 5  | Chicken, spinach, cookies                      | Finger-feeding/fork  | Water              |
| UCP 5 | 6  | Chicken, salad, bread with topping             | Finger-feeding/fork  | Water              |
| UCP 5 | 7  | PBJ sandwich, pretzels                         | Finger-feeding       | Water              |
| UCP 5 | 8  | PBJ sandwich, pretzels, cookies                | Finger-feeding       | Water              |
| UCP 5 | 9  | PBJ sandwich, brownie                          | Finger-feeding       | Water              |
| UCP 5 | 10 | PBJ sandwich                                   | Finger-feeding       | Water              |
| UCP 5 | 11 | PBJ sandwich, pretzel sticks, cookies, brownie | Finger-feeding       | Water              |
| UCP 5 | 12 | PBJ sandwich, pretzel sticks                   | Finger-feeding       | Water              |
| UCP 5 | 13 | PBJ sandwich, pretzel, cookie                  | Finger-feeding       | Water              |
| UCP 5 | 14 | PBJ sandwich, pretzel sticks, cookies          | Finger-feeding       | Water              |
| UCP 5 | 15 | Pizza                                          | Finger-feeding       | Soda               |
|       |    |                                                |                      |                    |
| UCP 6 | 1  | Sandwich                                       | Finger-feeding       | Apple juice        |
| UCP 6 | 2  | Kit-Kat bar, muffins                           | Finger-feeding       | Water              |
| UCP 6 | 3  | Kit-Kat bar, bread, fruit                      | Finger-feeding       | Apple juice        |
| UCP 6 | 4  | Granola bar, pretzel, grapes                   | Finger-feeding       | Apple juice        |

|       |    |                                               |                      |              |
|-------|----|-----------------------------------------------|----------------------|--------------|
| UCP 6 | 5  | Pretzels, granola bar                         | Finger-feeding       | Apple juice  |
| UCP 6 | 6  | Bagel, applesauce                             | Finger-feeding/spoon | Juice        |
| UCP 6 | 7  | Cheez-Its, pretzels, bagel, fruit, applesauce | Finger-feeding/spoon | Water        |
| UCP 6 | 8  | Apple slices, potato chips                    | Finger-feeding       | Juice, water |
| UCP 6 | 9  | Apple slices, bagel                           | Finger-feeding       | Water        |
| UCP 6 | 10 | Apple, grapes, pineapple                      | Finger-feeding/fork  | Juice        |
| UCP 6 | 11 | Potato chips, bagel, granola bar              | Finger-feeding       | Juice, water |
| UCP 6 | 12 | Fruit snacks, doughnut, potato chips          | Finger-feeding/fork  | Water        |
| UCP 6 | 13 | Potato chips, bagel, granola bar              | Finger-feeding       | Juice        |
| UCP 6 | 14 | Granola bar, bagel                            | Finger-feeding       | Water        |
| UCP 6 | 15 | Pizza                                         | Finger-feeding       | Water        |

### BCP group

| ID    | Day | Solid and Semisolid                                 | Utensils used        | Liquid        |
|-------|-----|-----------------------------------------------------|----------------------|---------------|
| BCP 1 | 1   | PBJ sandwich, cheese, peach, pudding, peanut butter | Finger-feeding/spoon |               |
| BCP 1 | 2   | Cheese, PB sandwich, fruit snack                    | Finger-feeding/spoon | Water         |
| BCP 1 | 3   | PB sandwich                                         | Finger-feeding       | Water, juice  |
| BCP 1 | 4   | NA                                                  |                      | NA            |
| BCP 1 | 5   | NA                                                  |                      | NA            |
| BCP 1 | 6   | Cheese and bread, apple crisps, gummy snack         | Finger-feeding       | Juice         |
| BCP 1 | 7   | Cheese, Cheerios bar                                | Finger-feeding       | Juice         |
| BCP 1 | 8   | PBJ sandwich, cheese PJ snacks                      | Finger-feeding       | Juice         |
| BCP 1 | 9   | Turkey salad wrap, biscuit                          | Finger-feeding       | Juice         |
| BCP 1 | 10  | Bread, plum, cheese                                 | Finger-feeding       | Juice         |
| BCP 1 | 11  | Cheese, Froot Loops, soft candy                     | Finger-feeding       | Juice         |
| BCP 1 | 12  | Cheese, apple, Cheerio bar                          | Finger-feeding       | Juice         |
| BCP 1 | 13  | Nutella PB bread, cheese, chocolate bar             | Finger-feeding       | Water         |
| BCP 1 | 14  | PB Nutella bread                                    | Finger-feeding       | Water         |
| BCP 1 | 15  | Pizza, chocolate                                    | Finger-feeding       | Water         |
|       |     |                                                     |                      |               |
| BCP 2 | 1   | NA                                                  |                      | NA            |
| BCP 2 | 2   | NA                                                  |                      | NA            |
| BCP 2 | 3   | Mac and cheese                                      | Spoon                | Water         |
| BCP 2 | 4   | Mashed potatoes                                     | Spoon                | Juice         |
| BCP 2 | 5   | NA                                                  |                      | NA            |
| BCP 2 | 6   | Vegetables (broccoli, carrots, potatoes)            | Finger-feeding/fork  | Lemonade      |
| BCP 2 | 7   | Sandwich                                            | Finger-feeding       | Juice         |
| BCP 2 | 8   | Cheese wrap                                         | Finger-feeding       | Juice         |
| BCP 2 | 9   | Apple, cheese and crackers                          | Finger-feeding       | Juice, sprite |
| BCP 2 | 10  | Apple, watermelon, popcorn                          | Finger-feeding       | Sprite        |
| BCP 2 | 11  | Grape, apple, watermelon, brownie, glazed doughnut  | Finger-feeding       | Water         |

|       |    |                                                         |                      |              |
|-------|----|---------------------------------------------------------|----------------------|--------------|
| BCP 2 | 12 | Burrito                                                 | Finger-feeding       | Sprite       |
| BCP 2 | 13 | Chicken, broccoli, carrots, cookie                      | Finger-feeding/fork  | Soda         |
| BCP 2 | 14 | NA                                                      |                      | NA           |
| BCP 2 | 15 | Pizza                                                   | Finger-feeding       | Soda         |
|       |    |                                                         |                      |              |
| BCP 3 | 1  | NA                                                      |                      | NA           |
| BCP 3 | 2  | NA                                                      |                      | NA           |
| BCP 3 | 3  | Strawberry, cheese, brownie, bagel, soybeans, chocolate | Finger-feeding       | Juice        |
| BCP 3 | 4  | NA                                                      |                      | NA           |
| BCP 3 | 5  | NA                                                      |                      | NA           |
| BCP 3 | 6  | Bagels with cheese, tomatoes, pretzels, cheese          | Finger-feeding       | Juice        |
| BCP 3 | 7  | Pasta, brownie, blueberries, pretzels                   | Finger-feeding/fork  | Juice        |
| BCP 3 | 8  | Chips, cheese, chickpeas                                | Finger-feeding/fork  | Juice        |
| BCP 3 | 9  | Sandwich, pita bread, cheese, chips                     | Finger-feeding       | Juice        |
| BCP 3 | 10 | Pasta, beans, pretzel                                   | Finger-feeding/fork  | Juice, water |
| BCP 3 | 11 | Bagel with PB, cheese, cracker                          | Finger-feeding       | Juice        |
| BCP 3 | 12 | Pita and cheese, cherry tomatoes, pretzels              | Finger-feeding/fork  | Water, juice |
| BCP 3 | 13 | Bagel with PB, pretzel, cucumber                        | Finger-feeding       | Water        |
| BCP 3 | 14 | Pasta, brownie, pretzel                                 | Finger-feeding/fork  | Water        |
| BCP 3 | 15 | Pretzel with PB, brownie                                | Finger-feeding       | Juice, water |
|       |    |                                                         |                      |              |
| BCP 4 | 1  | Yogurt, sandwich, cheese puffs, banana, pretzel         | Finger-feeding/spoon | Capri sun    |
| BCP 4 | 2  | Yogurt, cheese sticks, plain roll, sliced peach         | Finger-feeding/spoon | Juice        |
| BCP 4 | 3  | Yogurt, plain roll, sliced peaches, potato chips        | Finger-feeding/spoon | Juice        |
| BCP 4 | 4  | Roll, watermelon, cheese puffs                          | Finger-feeding       | Juice        |
| BCP 4 | 5  | Pizza, chips                                            | Finger-feeding       | Water        |
| BCP 4 | 6  | Yogurt, poll, peaches, popcorn                          | Finger-feeding/spoon | Juice        |
| BCP 4 | 7  | Yogurt, pretzels, strawberry                            | Finger-feeding/spoon | Water        |
| BCP 4 | 8  | Yogurt, roll, chips, fruit                              | Finger-feeding/spoon | Juice        |

|       |    |                                                                                    |                      |              |
|-------|----|------------------------------------------------------------------------------------|----------------------|--------------|
| BCP 4 | 9  | Yogurt, roll, pineapple, cheese puffs                                              | Finger-feeding/spoon | Juice, water |
| BCP 4 | 10 | Applesauce and carrots, rolls, chips                                               | Finger-feeding/spoon | Milk, juice  |
| BCP 4 | 11 | Yogurt, sandwich, watermelon, chips                                                | Finger-feeding/spoon | Juice, water |
| BCP 4 | 12 | Yogurt, sandwich, strawberry, chips, cracker                                       | Finger-feeding/spoon | Juice        |
| BCP 4 | 13 | Sandwich, chips, cheese stick, cracker, strawberry                                 | Finger-feeding       | Juice, water |
| BCP 4 | 14 | NA                                                                                 |                      | NA           |
| BCP 4 | 15 | Crackers, peaches, yogurt                                                          | Finger-feeding/spoon | Water        |
|       |    |                                                                                    |                      |              |
| BCP 5 | 1  | Bagel with PB, fruit snack, cookie, blueberries                                    | Finger-feeding       |              |
| BCP 5 | 2  | Cheese, chips, ham sandwich                                                        | Finger-feeding       | Water, juice |
| BCP 5 | 3  | Wrap, chips, beans, cookies                                                        | Finger-feeding/fork  | Water        |
| BCP 5 | 4  | Tortilla with ham and PB, chips, cookies                                           | Finger-feeding       | Water        |
| BCP 5 | 5  | NA                                                                                 |                      | NA           |
| BCP 5 | 6  | Sandwich, chips, cheese                                                            | Finger-feeding       | Juice        |
| BCP 5 | 7  | Sandwich, cookies, chips, strawberries, blueberries                                | Finger-feeding       | Water        |
| BCP 5 | 8  | Chips, wrap, M&Ms                                                                  | Finger-feeding       | Water        |
| BCP 5 | 9  | Bread, cheese, chips, salami, cherry, cracker                                      | Finger-feeding       | Water        |
| BCP 5 | 10 | Seaweed, bread, turkey, peas, peaches, strawberry, cracker, pretzel sticks, cherry | Finger-feeding       | Water        |
| BCP 5 | 11 | Salami, chips, peas, cracker, cheese, cherry, bread, cookie                        | Finger-feeding       |              |
| BCP 5 | 12 | Cracker, sandwich, chips, cherries                                                 | Finger-feeding       | Water        |
| BCP 5 | 13 | Cracker, wrap, cherries, cookie with chocolate                                     | Finger-feeding       | Water        |
| BCP 5 | 14 | Chips, wrap, cherries, cookie with chocolate                                       | Finger-feeding       | Water        |
| BCP 5 | 15 | Cookie, pizza, cherries                                                            | Finger-feeding       | Water        |
|       |    |                                                                                    |                      |              |
| BCP 6 | 1  | NA                                                                                 |                      | NA           |
| BCP 6 | 2  | NA                                                                                 |                      | NA           |
| BCP 6 | 3  | Yogurt, salmon, pineapple                                                          | Finger-feeding/spoon | Water        |
| BCP 6 | 4  | NA                                                                                 |                      | NA           |

|       |    |                                                    |                           |             |
|-------|----|----------------------------------------------------|---------------------------|-------------|
| BCP 6 | 5  | NA                                                 |                           | NA          |
| BCP 6 | 6  | Pasta with spinach, potato, watermelon             | Finger-feeding/fork       | Water       |
| BCP 6 | 7  | Yogurt, salmon, watermelon                         | Finger-feeding/spoon/fork | Water       |
| BCP 6 | 8  | Yogurt, chicken, bananas, grapes                   | Finger-feeding/spoon/fork | Water       |
| BCP 6 | 9  | Yogurt, chicken quesadilla                         | Finger-feeding/spoon      | Water       |
| BCP 6 | 10 | NA                                                 |                           | NA          |
| BCP 6 | 11 | Yogurt, cheese and chicken, grapes                 | Finger-feeding/spoon      | Water       |
| BCP 6 | 12 | Yogurt, PBJ wrap, pineapple                        | Finger-feeding/spoon      | Water       |
| BCP 6 | 13 | Yogurt, turkey cheeseburger, strawberry            | Finger-feeding/spoon      | Water       |
| BCP 6 | 14 | Applesauce, yogurt, chicken                        | Finger-feeding/spoon      | Water       |
| BCP 6 | 15 | Yogurt, pizza, grapes, pretzel                     | Finger-feeding/spoon      | Water       |
|       |    |                                                    |                           |             |
| BCP 7 | 1  | Yogurt, turkey sandwich, lettuce, pretzel chips    | Finger-feeding/spoon/fork | Water       |
| BCP 7 | 2  | Lettuce, burger, chips                             | Finger-feeding/fork       | Ensure      |
| BCP 7 | 3  | Yogurt, vegetable noodles, chips                   | Finger-feeding/fork/spoon | Water, milk |
| BCP 7 | 4  | Vegetable noodles, chips                           | Finger-feeding/fork       |             |
| BCP 7 | 5  | Pizza, chips                                       | Finger-feeding            | Water       |
| BCP 7 | 6  | Yoghurt, turkey sandwich, grapes, lettuce, chips   | Finger-feeding/spoon      | Water       |
| BCP 7 | 7  | Yogurt, bread with butter, red velvet cake, grapes | Finger-feeding/spoon      | Water       |
| BCP 7 | 8  | Yogurt, cream cheese sandwich, grapes              | Finger-feeding/spoon      | Water       |
| BCP 7 | 9  | Yogurt, egg noodles, chips                         | Finger-feeding/spoon      | Water       |
| BCP 7 | 10 | Yogurt, egg noodles, apple pie                     | Finger-feeding/spoon/fork | Milk        |
| BCP 7 | 11 | Sandwich, yogurt, apple crisp dessert              | Finger-feeding/spoon      | Water       |
| BCP 7 | 12 | Sandwich, yogurt, doughnut                         | Finger-feeding/spoon      | Water       |
| BCP 7 | 13 | Wrap, yogurt, cake                                 | Finger-feeding/spoon      | Water       |
| BCP 7 | 14 | NA                                                 |                           | NA          |
| BCP 7 | 15 | Yogurt                                             | Spoon                     | Water       |

*Note.* NA: Not applicable, as children were absent from camp during those days.
